# Supplementary material for: Does facility readiness promote high-quality of provider-initiated HIV testing and counseling to pregnant women? A national survey for improving policy of prevention of mother-to-child transmission of HIV in Tanzania
Source: PubMed Central journal article supplement (PMC8254244; doi:10.1186/s12981-021-00362-y), 2021-07-03
Supplement: 12981_2021_362_MOESM1_ESM.pdf [file 12981_2021_362_MOESM1_ESM.pdf]

**S1 Table: Summary of the measurement procedure of key independent variable “Facility readiness”**

| Domain                            | Indicators                                                   | Measure | Percent score (%) |        |
|-----------------------------------|--------------------------------------------------------------|---------|-------------------|--------|
|                                   |                                                              |         | Indicator         | Domain |
| Staff and guidelines              | Guidelines for PMTCT                                         | Yes     | 6.25              | 25.00  |
|                                   |                                                              | No      | 0.00              |        |
|                                   | Guidelines for infant and young child feeding counselling    | Yes     | 6.25              |        |
|                                   |                                                              | No      | 0.00              |        |
|                                   | At least one staff trained in PMTCT                          | Yes     | 6.25              |        |
|                                   |                                                              | No      | 0.00              |        |
|                                   | At least one staff trained in infant and young child feeding | Yes     | 6.25              |        |
|                                   |                                                              | No      | 0.00              |        |
| Equipment                         | Presence of visual and auditory privacy                      | Yes     | 25.00             | 25.00  |
|                                   |                                                              | No      | 0.00              |        |
| Diagnostics                       | Presence of RDT or ELISA for HIV testing of adults           | Yes     | 12.50             | 25.00  |
|                                   |                                                              | No      | 0.00              |        |
|                                   | Presence of DBS filter paper for diagnosing HIV in newborns  | Yes     | 12.50             |        |
|                                   |                                                              | No      | 0.00              |        |
| Medicine and commodities          | Zidovudine syrup                                             | Yes     | 8.33              | 25.00  |
|                                   |                                                              | No      | 0.00              |        |
|                                   | Nevirapine syrup                                             | Yes     | 8.33              |        |
|                                   |                                                              | No      | 0.00              |        |
|                                   | Maternal ARV prophylaxis                                     | Yes     | 8.33              |        |
|                                   |                                                              | No      | 0.00              |        |
| Total PMTCT readiness index score |                                                              |         |                   | 100.00 |

Note: Presence of maternal ARV were considered based on availability of either Option A: (AZT, NVP, and 3TC) or Option B: (AZT + 3TC + LPV or AZT + 3TC + ABC or AZT + 3TC + EFV or TDF + 3TC (or FTC) + EFV)
